# Supplementary material for: Photoluminescence and cathode-luminescence of Eu3+-doped NaLnTiO4 (Ln = Gd and Y) phosphors
Source: Royal Society of Chemistry journal article supplement (doi:10.1039/c3ra40375k), 2013-01-01
Supplement: c3ra40375k.pdf [file c3ra40375k.pdf]

## Supporting Figure

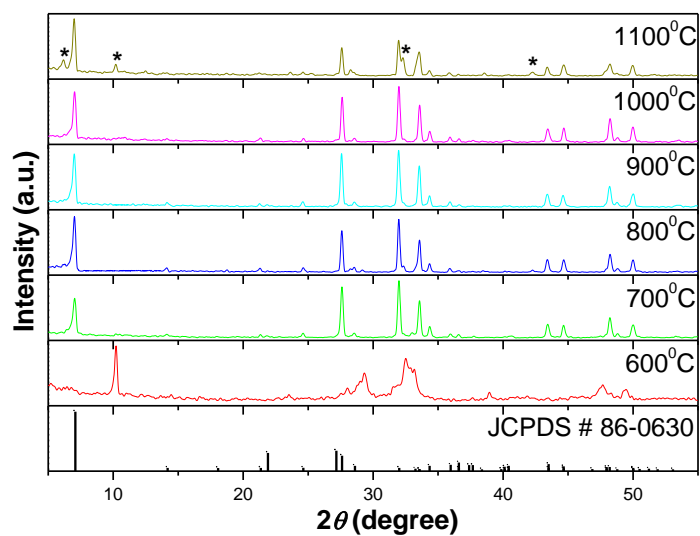

Fig. S1 XRD patterns of samples  $\text{NaGd}_{0.7}\text{Eu}_{0.3}\text{TiO}_4$  annealed at different temperature for 6 h in air (\* indicates the  $\text{Na}_2\text{Gd}_2\text{Ti}_3\text{O}_{10}$  peak).
